# Supplementary material for: Identification and molecular characterization of the alternative spliced variants of beta carbonic anhydrase 1 (βCA1) from Arabidopsis thaliana
Source: PeerJ. 2021 Dec 23;9:e12673. doi: 10.7717/peerj.12673 (PMC8710251; doi:10.7717/peerj.12673)
Supplement: Supplemental Information 8 [file peerj-09-12673-s008.xlsx]

## Sheet: Sheet1
initial_alias	converted_alias	name	description
A0A178W4H0	AT1G04410	MDH1	Malate dehydrogenase [Source:UniProtKB/TrEMBL;Acc:A0A178W4H0]
A0A384KN11	AT1G07320	RPL4	RPL4 [Source:UniProtKB/TrEMBL;Acc:A0A384KN11]
Q8W4H7	AT1G07920	A1	Elongation factor 1-alpha 4 [Source:UniProtKB/Swiss-Prot;Acc:Q8GTY0]
F4HUA0	AT1G07930	A1	Elongation factor 1-alpha 4 [Source:UniProtKB/Swiss-Prot;Acc:Q8GTY0]
A0A1P8ARX5	AT1G11580	ATPMEPCRA	methylesterase PCR A [Source:TAIR;Acc:AT1G11580]
A0A178WA64	AT1G12900	GAPA-2	glyceraldehyde 3-phosphate dehydrogenase A subunit 2 [Source:TAIR;Acc:AT1G12900]
C0Z2I0	AT1G13440	GAPC2	Glyceraldehyde-3-phosphate dehydrogenase GAPC2, cytosolic [Source:UniProtKB/Swiss-Prot;Acc:Q9FX54]
Q9LMQ2	AT1G15820	LHCB6	Chlorophyll a-b binding protein, chloroplastic [Source:UniProtKB/TrEMBL;Acc:Q9LMQ2]
B9DG18	AT1G20620	CAT3	catalase 3 [Source:TAIR;Acc:AT1G20620]
A0A178W0Z4	AT1G22300	GRF10	GRF10 [Source:UniProtKB/TrEMBL;Acc:A0A178W0Z4]
Q8VZ87	AT1G29910	LHCB1.1	Chlorophyll a-b binding protein 3, chloroplastic [Source:UniProtKB/Swiss-Prot;Acc:Q8VZ87]
P04778	AT1G29930	LHCB1.3	Chlorophyll a-b binding protein 1, chloroplastic [Source:UniProtKB/Swiss-Prot;Acc:P04778]
A0A178WLP9	AT1G32060	PRK	Phosphoribulokinase [Source:UniProtKB/TrEMBL;Acc:A0A178WLP9]
P46077	AT1G35160	GF14 PHI	GF14 protein phi chain [Source:UniProtKB/TrEMBL;Acc:F4HWQ5]
A0A178WKB6	AT1G42970	GAPB	Glyceraldehyde-3-phosphate dehydrogenase GAPB, chloroplastic [Source:UniProtKB/Swiss-Prot;Acc:P25857]
A0A178WDT7	AT1G43170	ARP1	60S ribosomal protein L3-1 [Source:UniProtKB/Swiss-Prot;Acc:P17094]
Q8LB94	AT1G49240	ACT8	Actin-8 [Source:UniProtKB/Swiss-Prot;Acc:Q96293]
A0A178WBS0	AT1G56070	LOS1	Elongation factor 2 [Source:UniProtKB/Swiss-Prot;Acc:Q9ASR1]
A0A178W4Q1	AT1G56190	AT1G56190	Phosphoglycerate kinase [Source:UniProtKB/TrEMBL;Acc:A0A178W4Q1]
A0A178W0N9	AT1G56410	HSP70-18	Heat shock 70 kDa protein 18 [Source:UniProtKB/Swiss-Prot;Acc:Q9C7X7]
A0A178WGF2	AT1G57720	AT1G57720	Probable elongation factor 1-gamma 2 [Source:UniProtKB/Swiss-Prot;Acc:Q9FVT2]
A0A075M569	AT1G67090	RBCS-1A	Ribulose bisphosphate carboxylase small chain [Source:UniProtKB/TrEMBL;Acc:A0A178WD57]
A0A178WJ05	AT1G68560	XYL1	Alpha-xylosidase 1 [Source:UniProtKB/Swiss-Prot;Acc:Q9S7Y7]
A0A178W987	AT1G70410	BCA4	Beta carbonic anhydrase 4 [Source:UniProtKB/Swiss-Prot;Acc:Q94CE4]
Q96520	AT1G71695	PER12	Peroxidase [Source:UniProtKB/TrEMBL;Acc:A0A178WB34]
Q01525	AT1G78300	GRF2	14-3-3-like protein GF14 omega [Source:UniProtKB/Swiss-Prot;Acc:Q01525]
Q9ZVA2	AT1G78830	AT1G78830	EP1-like glycoprotein 2 [Source:UniProtKB/Swiss-Prot;Acc:Q9ZVA2]
A0A178WJI0	AT1G78850	AT1G78850	EP1-like glycoprotein 3 [Source:UniProtKB/Swiss-Prot;Acc:Q9ZVA4]
O23654	AT1G78900	VHA-A	VHA-A [Source:UniProtKB/TrEMBL;Acc:A0A384LM33]
A0A178VSN5	AT2G18960	AHA1	Plasma membrane ATPase [Source:UniProtKB/TrEMBL;Acc:A0A178VSN5]
Q9SJU4	AT2G21330	FBA1	Fructose-bisphosphate aldolase 1, chloroplastic [Source:UniProtKB/Swiss-Prot;Acc:Q9SJU4]
A0A178VZW6	AT2G28000	CPN60A1	SLP [Source:UniProtKB/TrEMBL;Acc:A0A178VZW6]
A0A178VN84	AT2G33800	RPS5	30S ribosomal protein S5, chloroplastic [Source:UniProtKB/Swiss-Prot;Acc:P93014]
A0A178VRB0	AT2G34420	LHB1B2	Chlorophyll a-b binding protein, chloroplastic [Source:UniProtKB/TrEMBL;Acc:Q39141]
A0A178VSL1	AT2G37620	ACT1	Actin-3 [Source:UniProtKB/Swiss-Prot;Acc:P0CJ47]
A0A178VZ00	AT2G38230	PDX11	Pyridoxal 5'-phosphate synthase subunit PDX1.1 [Source:UniProtKB/Swiss-Prot;Acc:O80448]
A0A178VUM0	AT2G39730	RCA	Ribulose bisphosphate carboxylase/oxygenase activase, chloroplastic [Source:UniProtKB/Swiss-Prot;Acc:P10896]
B9DFR9	AT2G45960	PIP1B	Plasma membrane intrinsic protein 1B [Source:UniProtKB/TrEMBL;Acc:A8MRW1]
A0A1I9LQB3	AT3G01500	BCA1	Beta carbonic anhydrase 1, chloroplastic [Source:UniProtKB/Swiss-Prot;Acc:P27140]
A0A168L4G8	AT3G04120	GAPC1	Glyceraldehyde-3-phosphate dehydrogenase GAPC1, cytosolic [Source:UniProtKB/Swiss-Prot;Acc:P25858]
A0A384KYV2	AT3G08580	AAC1	AAC1 [Source:UniProtKB/TrEMBL;Acc:A0A384KYV2]
Q9XF88	AT3G08940	LHCB4.2	Chlorophyll a-b binding protein CP29.2, chloroplastic [Source:UniProtKB/Swiss-Prot;Acc:Q9XF88]
A0A178VDX8	AT3G09630	RPL4A	60S ribosomal protein L4-1 [Source:UniProtKB/Swiss-Prot;Acc:Q9SF40]
A0A178V5M8	AT3G12780	PGK1	Phosphoglycerate kinase [Source:UniProtKB/TrEMBL;Acc:A0A178V5M8]
A0A178VIX7	AT3G13470	CPN60B2	Chaperonin 60 subunit beta 2, chloroplastic [Source:UniProtKB/Swiss-Prot;Acc:Q9LJE4]
A0A178V707	AT3G13920	EIF4A1	Eukaryotic translation initiation factor 4A1 [Source:UniProtKB/TrEMBL;Acc:A0A1I9LSZ7]
A0A178V7Z2	AT3G14210	ESM1	GDSL esterase/lipase ESM1 [Source:UniProtKB/Swiss-Prot;Acc:Q9LJG3]
A0A178VDL9	AT3G14310	PME3	Pectinesterase/pectinesterase inhibitor 3 [Source:UniProtKB/Swiss-Prot;Acc:O49006]
Q9LRS0	AT3G14415	AT3G14415	GOX2 [Source:UniProtKB/TrEMBL;Acc:A0A384L6X3]
A0A178VGT8	AT3G14420	GLO1	(S)-2-hydroxy-acid oxidase GLO1 [Source:UniProtKB/Swiss-Prot;Acc:Q9LRR9]
F4J8V9	AT3G18780	ACT2	Actin-2 [Source:UniProtKB/Swiss-Prot;Acc:Q96292]
A0A178VEN0	AT3G23990	CPN60	Chaperonin CPN60, mitochondrial [Source:UniProtKB/Swiss-Prot;Acc:P29197]
A0A178VFT9	AT3G25920	RPL15	50S ribosomal protein L15, chloroplastic [Source:UniProtKB/Swiss-Prot;Acc:P25873]
P25856	AT3G26650	GAPA1	Glyceraldehyde-3-phosphate dehydrogenase GAPA1, chloroplastic [Source:UniProtKB/Swiss-Prot;Acc:P25856]
A0A384KGR2	AT3G32980	PER32	Peroxidase 32 [Source:UniProtKB/Swiss-Prot;Acc:Q9LHB9]
P53497	AT3G46520	ACT12	Actin-12 [Source:UniProtKB/Swiss-Prot;Acc:P53497]
A0A178VDZ1	AT3G46780	PTAC16	Protein PLASTID TRANSCRIPTIONALLY ACTIVE 16, chloroplastic [Source:UniProtKB/Swiss-Prot;Acc:Q9STF2]
A0A178V694	AT3G52930	FBA8	Fructose-bisphosphate aldolase [Source:UniProtKB/TrEMBL;Acc:A0A178V8L4]
A0A178VSL1	AT3G53750	ACT1	Actin-3 [Source:UniProtKB/Swiss-Prot;Acc:P0CJ47]
P46283	AT3G55800	SBPASE	Sedoheptulose-1,7-bisphosphatase, chloroplastic [Source:UniProtKB/Swiss-Prot;Acc:P46283]
F4JBY2	AT3G60750	TKL-1	Transketolase-1, chloroplastic [Source:UniProtKB/Swiss-Prot;Acc:Q8RWV0]
A0A178VIZ0	AT3G61430	PIP1-1	PIP1A [Source:UniProtKB/TrEMBL;Acc:A0A178VIZ0]
A0A178V3W4	AT4G01310	RPL5	50S ribosomal protein L5, chloroplastic [Source:UniProtKB/Swiss-Prot;Acc:O04603]
Q9S7H1	AT4G02770	PSAD1	Photosystem I reaction center subunit II-1, chloroplastic [Source:UniProtKB/Swiss-Prot;Acc:Q9S7H1]
Q9SUI9	AT4G04640	ATPC1	ATP synthase gamma chain 1, chloroplastic [Source:UniProtKB/Swiss-Prot;Acc:Q01908]
F4JJ94	AT4G09000	GRF1	General regulatory factor 1 [Source:UniProtKB/TrEMBL;Acc:F4JJ94]
Q39258	AT4G11150	VHA-E1	V-type proton ATPase subunit E1 [Source:UniProtKB/Swiss-Prot;Acc:Q39258]
O23255	AT4G13940	SAHH1	Adenosylhomocysteinase 1 [Source:UniProtKB/Swiss-Prot;Acc:O23255]
Q940J8	AT4G19410	AT4G19410	Pectin acetylesterase [Source:UniProtKB/TrEMBL;Acc:F4JT64]
P17745	AT4G20360	TUFA	Elongation factor Tu, chloroplastic [Source:UniProtKB/Swiss-Prot;Acc:P17745]
A0A178V345	AT4G24280	HSP70-6	Heat shock 70 kDa protein 6, chloroplastic [Source:UniProtKB/Swiss-Prot;Acc:Q9STW6]
Q9SZD6	AT4G29060	emb2726	Elongation factor Ts, mitochondrial [Source:UniProtKB/TrEMBL;Acc:Q9SZD6]
A0A178V0D0	AT4G30170	PER45	Peroxidase 45 [Source:UniProtKB/Swiss-Prot;Acc:Q96522]
Q0WWU1	AT4G32460	AT4G32460	At4g32460 [Source:UniProtKB/TrEMBL;Acc:Q8LAR0]
Q94B78	AT4G33010	GLDP1	Glycine cleavage system P protein [Source:UniProtKB/TrEMBL;Acc:A0A178UTF1]
A0A178UWV4	AT4G34200	PGDH1	D-3-phosphoglycerate dehydrogenase [Source:UniProtKB/TrEMBL;Acc:A0A178UWV4]
Q9SZJ5	AT4G37930	SHM1	Serine hydroxymethyltransferase 1, mitochondrial [Source:UniProtKB/Swiss-Prot;Acc:Q9SZJ5]
A0A178UW98	AT4G38970	FBA2	Fructose-bisphosphate aldolase [Source:UniProtKB/TrEMBL;Acc:A0A178UW98]
Q0WW97	AT5G01530	LHCB4.1	Chlorophyll a-b binding protein CP29.1, chloroplastic [Source:UniProtKB/Swiss-Prot;Acc:Q07473]
A0A178UL64	AT5G02500	MED37E	Probable mediator of RNA polymerase II transcription subunit 37e [Source:UniProtKB/Swiss-Prot;Acc:P22953]
A0A178UAH8	AT5G02870	RPL4D	60S ribosomal protein L4-2 [Source:UniProtKB/Swiss-Prot;Acc:P49691]
A0A178UNU3	AT5G04140	GLU1	glutamate synthase 1 [Source:TAIR;Acc:AT5G04140]
C0Z342	AT5G07090	RPS4B	40S ribosomal protein S4-2 [Source:UniProtKB/Swiss-Prot;Acc:P49204]
Q8H135	AT5G08670	AT5G08670	ATP synthase alpha/beta family protein [Source:TAIR;Acc:AT5G08670]
Q9C5A9	AT5G08680	AT5G08680	ATP synthase subunit beta-3, mitochondrial [Source:UniProtKB/Swiss-Prot;Acc:Q9C5A9]
A0A178UB86	AT5G08690	AT5G08690	ATP synthase subunit beta-2, mitochondrial [Source:UniProtKB/Swiss-Prot;Acc:P83484]
Q8LCM9	AT5G11420	AT5G11420	Uncharacterized protein At5g11420 [Source:UniProtKB/TrEMBL;Acc:Q9LYE7]
A0A178UT81	AT5G14740	BCA2	Beta carbonic anhydrase 2, chloroplastic [Source:UniProtKB/Swiss-Prot;Acc:P42737]
A0A178UNW3	AT5G17920	MS1	5-methyltetrahydropteroyltriglutamate--homocysteine methyltransferase 1 [Source:UniProtKB/Swiss-Prot;Acc:O50008]
A0A1P8BG25	AT5G20950	AT5G20950	Glycosyl hydrolase family protein [Source:TAIR;Acc:AT5G20950]
A0A178UBZ3	AT5G23060	CAS	Calcium sensing receptor, chloroplastic [Source:UniProtKB/Swiss-Prot;Acc:Q9FN48]
Q8LEX7	AT5G25460	AT5G25460	At5g25460 [Source:UniProtKB/TrEMBL;Acc:Q94F20]
Q9LKR3	AT5G28540	MED37A	Mediator of RNA polymerase II transcription subunit 37a [Source:UniProtKB/Swiss-Prot;Acc:Q9LKR3]
A0A178ULV9	AT5G30510	RPS1	30S ribosomal protein S1, chloroplastic [Source:UniProtKB/Swiss-Prot;Acc:Q93VC7]
A0A384L697	AT5G35630	GLN2	Glutamine synthetase, chloroplastic/mitochondrial [Source:UniProtKB/Swiss-Prot;Acc:Q43127]
P10798	AT5G38410	AT5G38410	Ribulose bisphosphate carboxylase small chain [Source:UniProtKB/TrEMBL;Acc:B3H5S2]
A0A075M4Z6	AT5G38420	RBCS-2B	Ribulose bisphosphate carboxylase small chain 2B, chloroplastic [Source:UniProtKB/Swiss-Prot;Acc:P10797]
P10796	AT5G38430	RBCS-1B	Ribulose bisphosphate carboxylase small chain 1B, chloroplastic [Source:UniProtKB/Swiss-Prot;Acc:P10796]
A0A178UA42	AT5G38480	GRF3	RCI1 [Source:UniProtKB/TrEMBL;Acc:A0A178UA42]
A0A1P8BF32	AT5G42020	BIP	Heat shock protein 70 (Hsp 70) family protein [Source:TAIR;Acc:AT5G42020]
A0A178U8J6	AT5G42270	FTSH5	VAR1 [Source:UniProtKB/TrEMBL;Acc:A0A178U8J6]
Q9FNC4	AT5G44020	AT5G44020	HAD superfamily, subfamily IIIB acid phosphatase [Source:UniProtKB/TrEMBL;Acc:Q9FNC4]
A0A178UDJ5	AT5G49910	HSP70-7	Heat shock 70 kDa protein 7, chloroplastic [Source:UniProtKB/Swiss-Prot;Acc:Q9LTX9]
A0A178UE63	AT5G50920	CLPC1	Chaperone protein ClpC1, chloroplastic [Source:UniProtKB/Swiss-Prot;Acc:Q9FI56]
P51818	AT5G56010	HSP90-3	Heat shock protein 90-3 [Source:UniProtKB/Swiss-Prot;Acc:P51818]
A0A178ULZ9	AT5G56030	HSP81-2	Heat shock protein 81-2 [Source:UniProtKB/TrEMBL;Acc:F4K6B6]
P53494	AT5G59370	ACT4	Actin-4 [Source:UniProtKB/Swiss-Prot;Acc:P53494]
Q8W4H7	AT5G60390	A1	Elongation factor 1-alpha 4 [Source:UniProtKB/Swiss-Prot;Acc:Q8GTY0]
A0A178UMG2	AT5G64260	EXL2	Protein EXORDIUM-like 2 [Source:UniProtKB/Swiss-Prot;Acc:Q9FE06]
P23321	AT5G66570	PSBO1	Oxygen-evolving enhancer protein 1-1, chloroplastic [Source:UniProtKB/Swiss-Prot;Acc:P23321]
