# Supplementary material for: Identification and molecular characterization of the alternative spliced variants of beta carbonic anhydrase 1 (βCA1) from Arabidopsis thaliana
Source: PeerJ. 2021 Dec 23;9:e12673. doi: 10.7717/peerj.12673 (PMC8710251; doi:10.7717/peerj.12673)
Supplement: Supplemental Information 9 [file peerj-09-12673-s009.xlsx]

## Sheet: Sheet1
Name	sequence 5'---3'	Purpose
CA1.2-OXF	GGGGACAAGTTTGTACAAAAAAGCAGGCTTCATGTCGACCGCTCCTCTC	for 35S:βCA1.1-GFP, 35S:βCA1.2-GFP, 35S:βCA1.3-GFP, 35S:βCA1.4-GFP
CA1.2-OXR	GGGGACCACTTTGTACAAGAAAGCTGGGTCCTACAGCTTCCAATGTAGTATG
CA1.4-OXF	GGGGACAAGTTTGTACAAAAAAGCAGGCTTCATGGGAACCGAAGCATAC
CA1.4-OXR	GGGGACCACTTTGTACAAGAAAGCTGGGTCTACAGAGCTAGTTTCGGAGA
CA1-ConF	GGGGACAAGTTTGTACAAAAAAGCAGGCTGCCGTTGCCCACTTTACAT
CA1-proF	GCCGTTGCCCACTTTACAT	for pCA1:CA1
CA1.1-proR	GGATCCTTGTTGGCGAAGAGAA
CA1.1-CDSF	GGATCCATGTCGACCGCTCCT
CA1.1-CDSR	GGATCCCAGCTTCCAATGTAGTATGGTA
CA1.3-CDSR	ggatccTACAGAGCTAGTTTCGGAGA
CA1-HA-R1	AGCGTAGTCTGGGACGTCGTATGGGTACAGCTTCCAATGTAGTATGGT	for pCA1:CA1-HA
CA1-HA-F	TACCCATACGACGTCCCAGACTACGCTTAGGAAACTCTTTGAAGCCTT
CA1-HA-R2	GGGGACCACTTTGTACAAGAAAGCTGGGTCCAAATTTCTGTCCCCCAAGA
CA1-Myc-R1	CAGATCCTCTTCAGAGATGAGTTTCTGCTCTACAGAGCTAGTTTCGGAGA	for pCA1:CA1-Myc
CA1-Myc-F	GAGCAGAAACTCATCTCTGAAGAGGATCTGTGAACCAATCCATCATCATC
AtCA1F1	TCCGCTTCTCTTCGCCAACAA	for RT-PCR
AtCA1R1	TGAAATCGGGTAAGGCTTCAA
AtCA1F2	CAACCAATCCCATTATTCACTTA
AtCA1R2	GCTTCCAATGTAGTATGGTAGCC
AtCA1F3	GCTTCTTTCTCACTTCACTTTCTCCT
AtActin2F	GTATGGTGAAGGCTGGATTTGC
AtActin2R	GAGGTAATCAGTAAGGTCACGTCC
