# Supplementary material for: Identification and molecular characterization of the alternative spliced variants of beta carbonic anhydrase 1 (βCA1) from Arabidopsis thaliana
Source: PeerJ. 2021 Dec 23;9:e12673. doi: 10.7717/peerj.12673 (PMC8710251; doi:10.7717/peerj.12673)
Supplement: Supplemental Information 10 [file peerj-09-12673-s010.xlsx]

## Sheet: Sheet1
Number	GO	Category	Description	Count	%
1	M00165	KEGG Pathway	reductive pentose phosphate cycle (Calvin cycle)	17	15.6
2	GO:0015979	GO Biological Processes	photosynthesis	20	18.35
3	ath00630	KEGG Pathway	glyoxylate and dicarboxylate metabolism	12	11.01
4	ath00190	GO Biological Processes	oxidative phosphorylation	9	8.26
5	GO:0042026	GO Biological Processes	protein refolding	7	6.42
6	GO:0010038	GO Biological Processes	response to metal ion	11	10.09
7	ath00910	KEGG Pathway	nitrogen metabolism	5	4.59
8	GO:1902600	GO Biological Processes	proton transmembrane transport	6	5.5
9	GO:0051131	GO Biological Processes	chaperone-mediated protein complex assembly	3	2.75
10	WP2279	WikiPathways	seed development	9	8.26
11	ath03010	KEGG Pathway	ribosome	9	8.26
12	GO:0009744	GO Biological Processes	response to sucrose	4	3.67
13	WP2621	WikiPathways	glycolysis	3	2.75
14	GO:0043648	GO Biological Processes	dicarboxylic acid metabolic process	4	3.67
15	GO:0009767	GO Biological Processes	photosynthetic electron transport chain	3	2.75
16	GO:0045036	GO Biological Processes	protein targeting to chloroplast	3	2.75
17	GO:0048767	GO Biological Processes	root hair elongation	3	2.75
18	GO:0009657	GO Biological Processes	plastid organization	6	5.5
19	GO:0009742	GO Biological Processes	brassinosteroid mediated signaling pathway	3	2.75
20	GO:0009266	GO Biological Processes	response to temperature stimulus	24	21.1
21	GO:0009408	GO Biological Processes	response to cold	6	5.5
