# Supplementary material for: Identification and molecular characterization of the alternative spliced variants of beta carbonic anhydrase 1 (βCA1) from Arabidopsis thaliana
Source: PeerJ journal article supplement (doi:10.7717/peerj.12673), 2021-12-23

AT3G01500

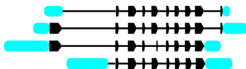

Glyma.19G007700

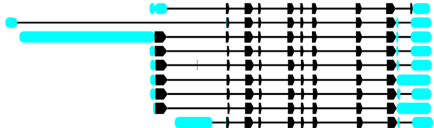

Potri.001G348900

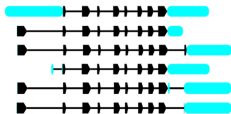

Sobic.003G234500

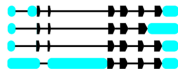

Pp3c1\_19190

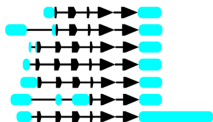

Bradi2g44856

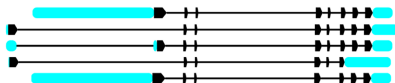

LOC\_Os01g45274

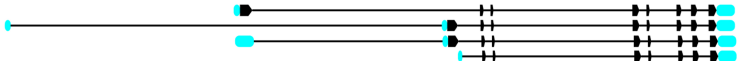

Supplement: Supplemental_Figure_S1.pdf [file Supplemental_Figure_S1.pdf]
