# Supplementary material for: Identification and molecular characterization of the alternative spliced variants of beta carbonic anhydrase 1 (βCA1) from Arabidopsis thaliana
Source: PeerJ journal article supplement (doi:10.7717/peerj.12673), 2021-12-23

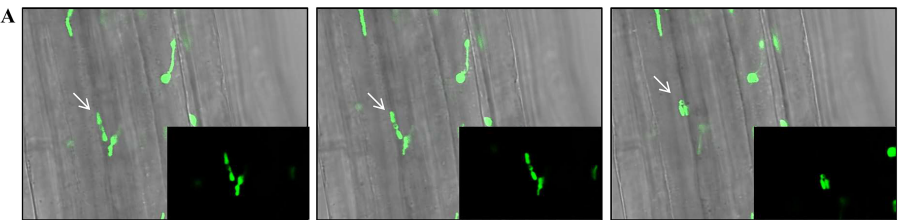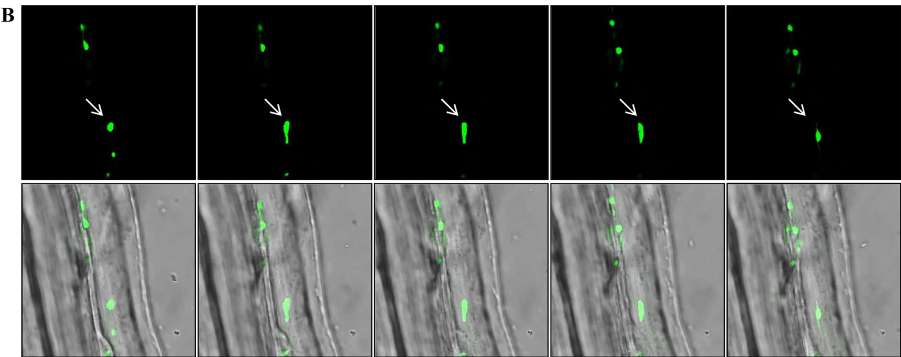

Supplement: Supplemental_Figure_S2.pdf [file Supplemental_Figure_S2.pdf]
