# Supplementary material for: Identification and molecular characterization of the alternative spliced variants of beta carbonic anhydrase 1 (βCA1) from Arabidopsis thaliana
Source: PeerJ journal article supplement (doi:10.7717/peerj.12673), 2021-12-23
Supplement: Supplemental_Figure_S3.pdf [file Supplemental_Figure_S3.pdf]

Seedling Shoot Root

CA1.1-GFP

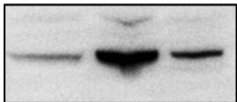

CA1.2-GFP

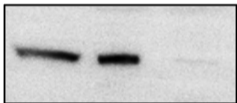

CA1.3-GFP

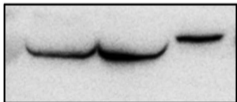

CA1.4-GFP

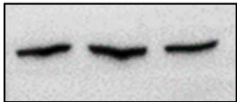

$\alpha$ -GFP
