# Supplementary material for: Identification and molecular characterization of the alternative spliced variants of beta carbonic anhydrase 1 (βCA1) from Arabidopsis thaliana
Source: PeerJ journal article supplement (doi:10.7717/peerj.12673), 2021-12-23

Figure 1C

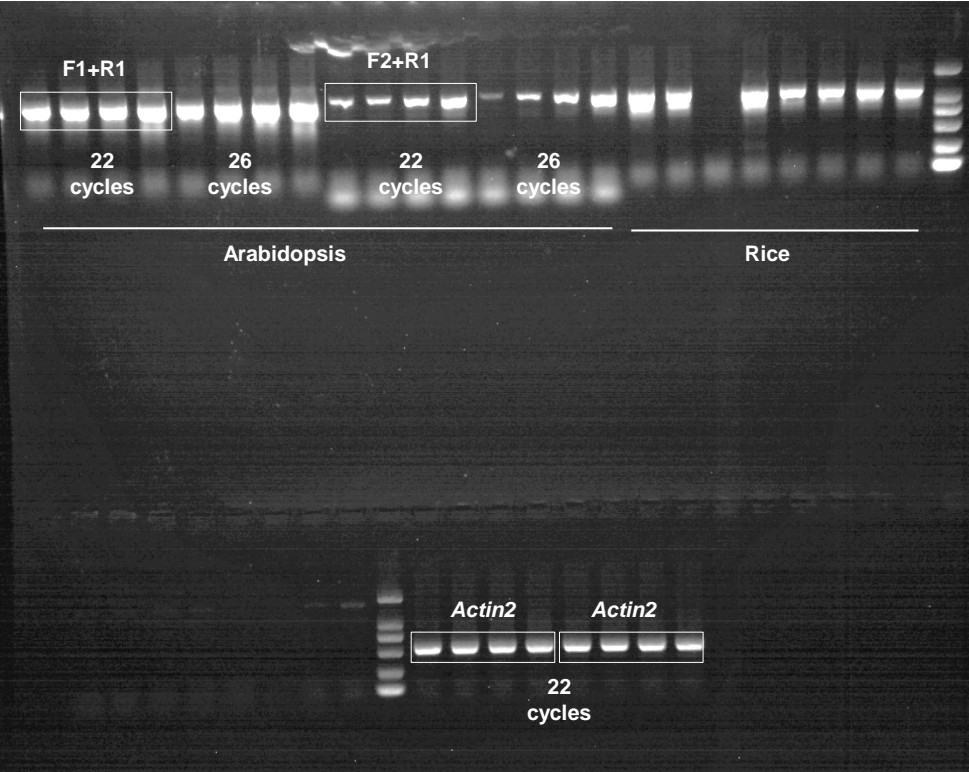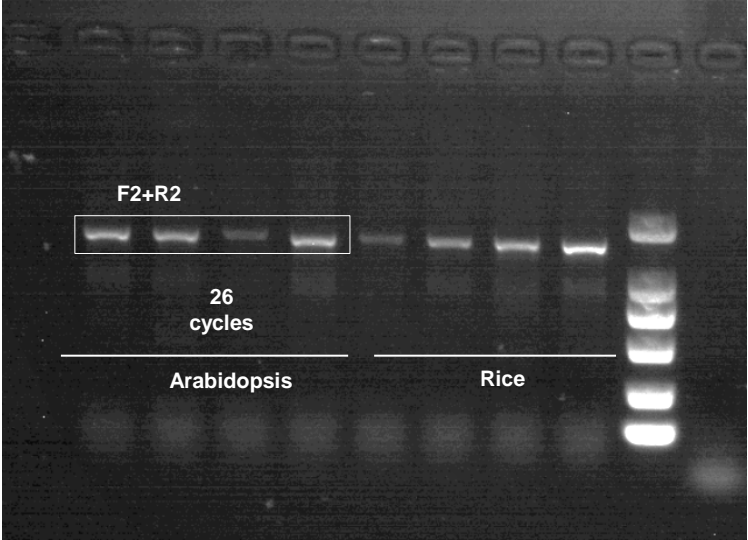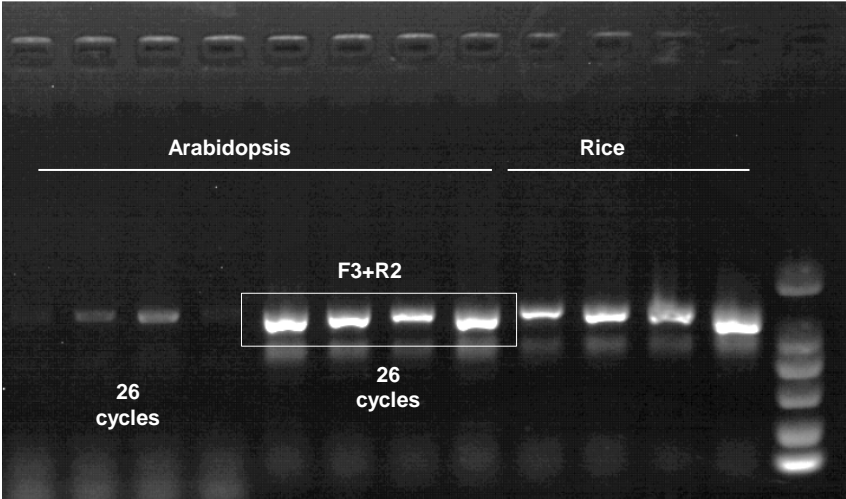

Figure 1D

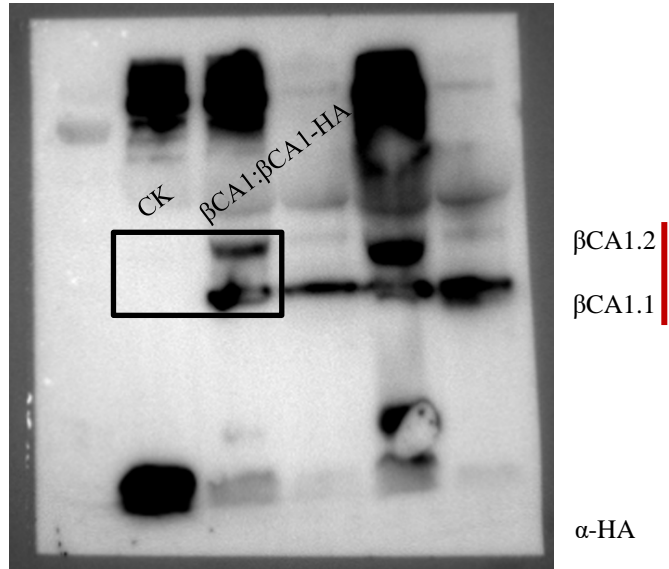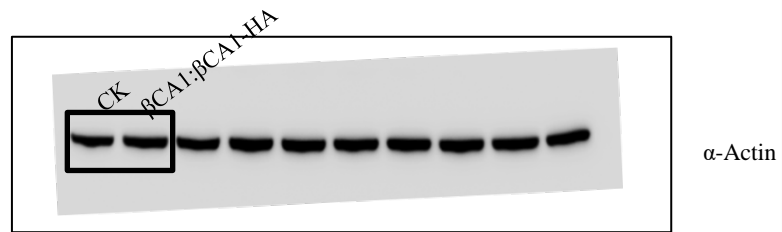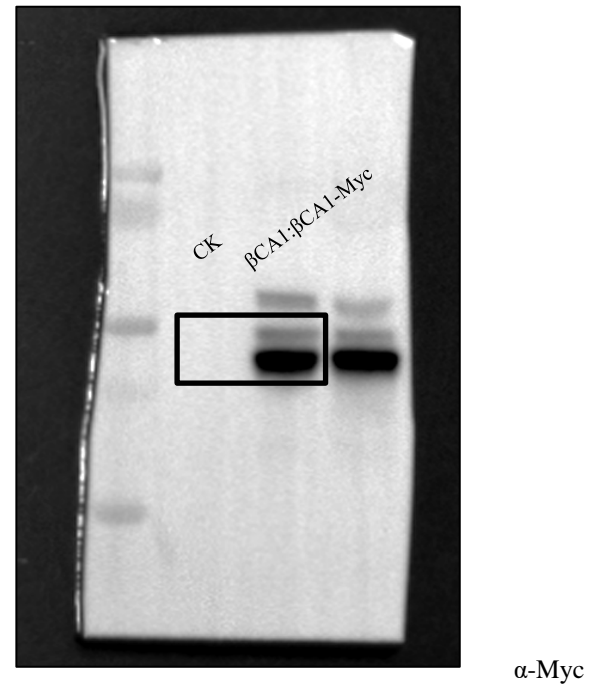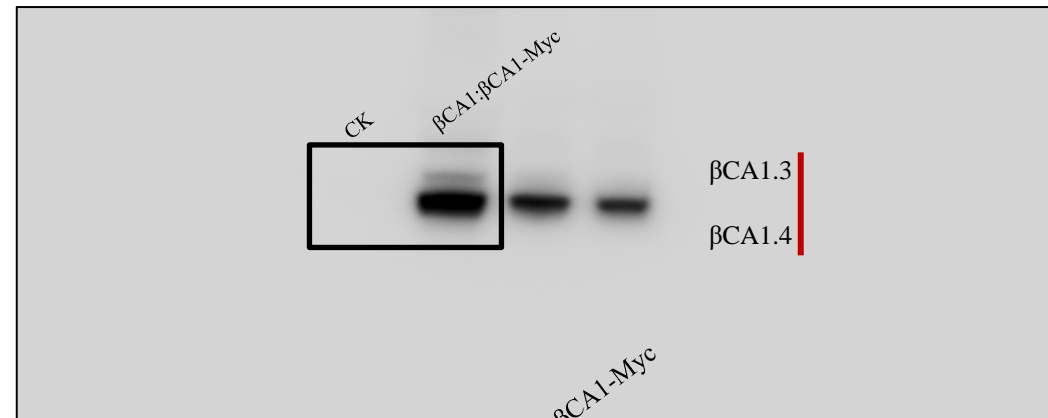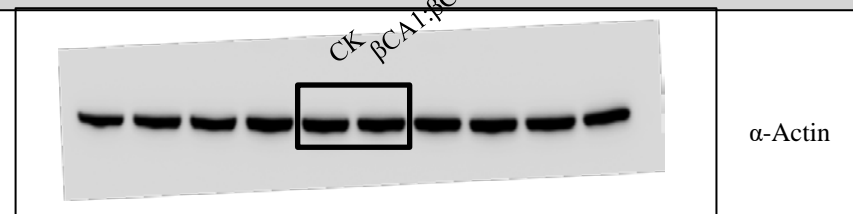

Figure 3A

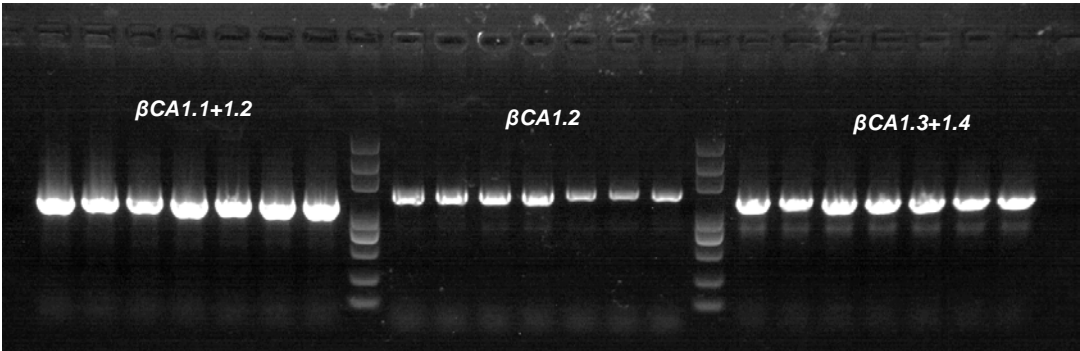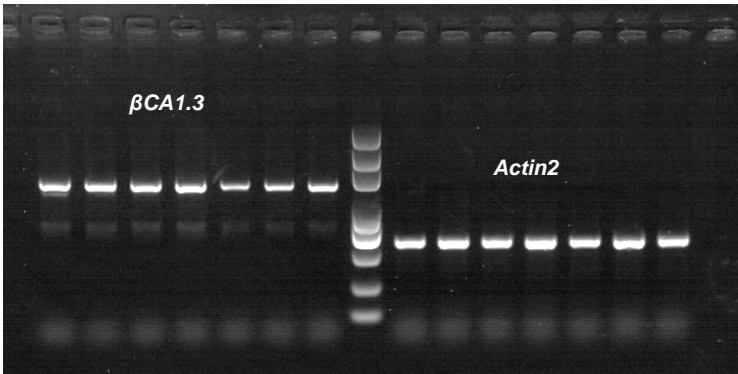

Supplement: Supplemental_uncroped_Gel_Blot.pdf [file Supplemental_uncroped_Gel_Blot.pdf]
